# Supplementary material for: Different TCR-induced T lymphocyte responses are potentiated by stiffness with variable sensitivity
Source: eLife journal article supplement (doi:10.7554/elife.23190), 2017-06-08
Supplement: figures [file elife-23190-figures-v2.pdf]

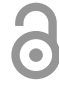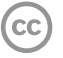

---

## Figures and figure supplements

Different TCR-induced T lymphocyte responses are potentiated by stiffness with variable sensitivity

**Michael Saitakis *et al***

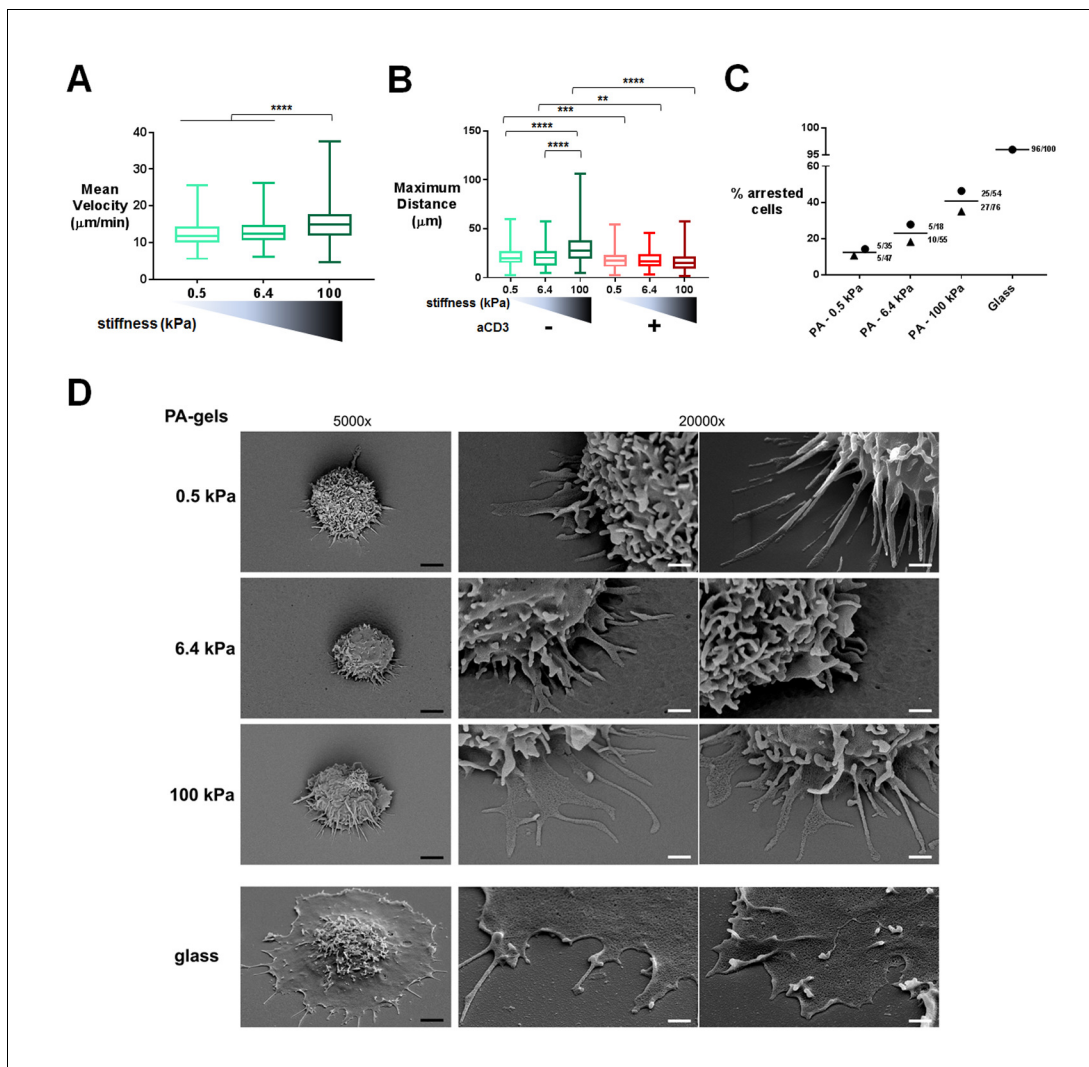

**Figure 1.** T cell migratory properties and morphology are modulated by substrate stiffness. (A) Mean instantaneous velocities of migrating T cells on ICAM-1-coated PA-gels of varying stiffness ( $n_{\text{cells}}$ : 50–100 for each condition from  $n_{\text{Donors}}$ : 4). (B) Maximum distance travelled by T cells on PA-gels of varying stiffness for a duration of 5 min ( $n_{\text{cells}}$ : 50–100 for each condition from  $n_{\text{Donors}}$ : 4). Boxes and whiskers for minimum and maximum are shown. For statistical analysis, unpaired parametric t-tests were performed: \*\*\*\*p-value<0.0001, \*\*\*p-value<0.001, \*\*p-value<0.01. (C) Percentage of arrested cells on aCD3+aCD28+ICAM-1 coated PA-gels of varying stiffness. T cell response on glass coated with aCD3+aCD28+ICAM-1 is shown for comparison. Mean values and number of cells per condition are shown ( $n_{\text{Donors}}$ : 2). (D) Scanning electron microscopy pictures of T cells (representative of  $n_{\text{cells}}$ : 5 per condition from  $n_{\text{Donors}}$ : 2) on aCD3+aCD28+ICAM-1-coated substrates for two magnifications (5000x and 20000x). Black scale bars: 2  $\mu\text{m}$ , white scale bars: 500 nm.

DOI: 10.7554/eLife.23190.004

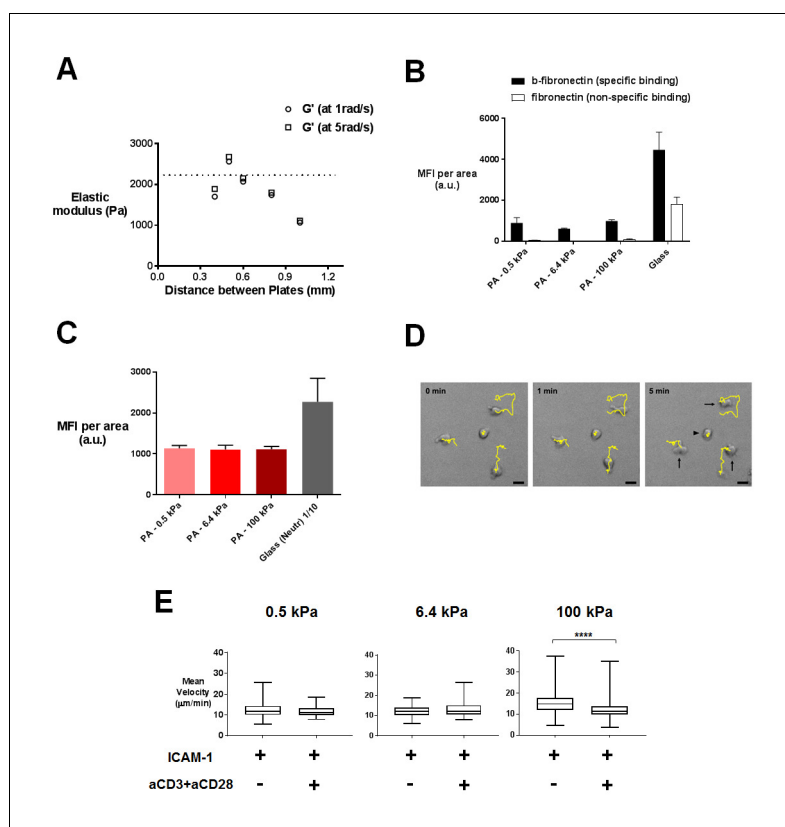

**Figure 1—figure supplement 1.** Characterization of PA-gels and additional data on migration. (A) Measurement of the elastic modulus  $G'$  of a PA-gel containing 5% acrylamide and 0.5% bis-acrylamide. The value associated to a given sample corresponds to the maximum of  $G'$  as a function of the distance between the rheometer plates. The dotted line shows the mean value of the elastic shear modulus  $G' = 2212 \pm 79$  Pa for  $n = 15$  different samples of PA-gels at 5% acrylamide and 0.5% bis-acrylamide. (B) Coating of PA-gels and glass coverslips by biotinylated (b-fibronectin) or non biotinylated fibronectin quantified by immunofluorescence labeling. (C) Biotinylated antibody coating on streptavidin containing PA-gels of varying stiffness and neutravidin-coated glass coverslips quantified by immunofluorescence labeling ( $n_{\text{samples}}: 14$ ). (D) 5 min tracks of individual  $CD4^+$  T lymphoblasts on the 100 kPa gels coated with aCD3+aCD28+ICAM-1. Arrows indicate migrating cells and the arrowhead indicates an arrested cell. Scale bar: 10  $\mu\text{m}$ . (E) Mean instantaneous velocities of migrating T cells on PA-gels of varying stiffness, coated with either ICAM-1 or aCD3+aCD28+ICAM-1, for a duration of 5 min ( $n_{\text{cells}}: 50\text{--}100$  for each condition from  $n_{\text{Donors}}: 4$ ). Boxes and whiskers for minimum and maximum are shown. For statistical analysis, unpaired parametric t-tests were performed: \*\*\*\*p-value<0.0001.

DOI: 10.7554/eLife.23190.005

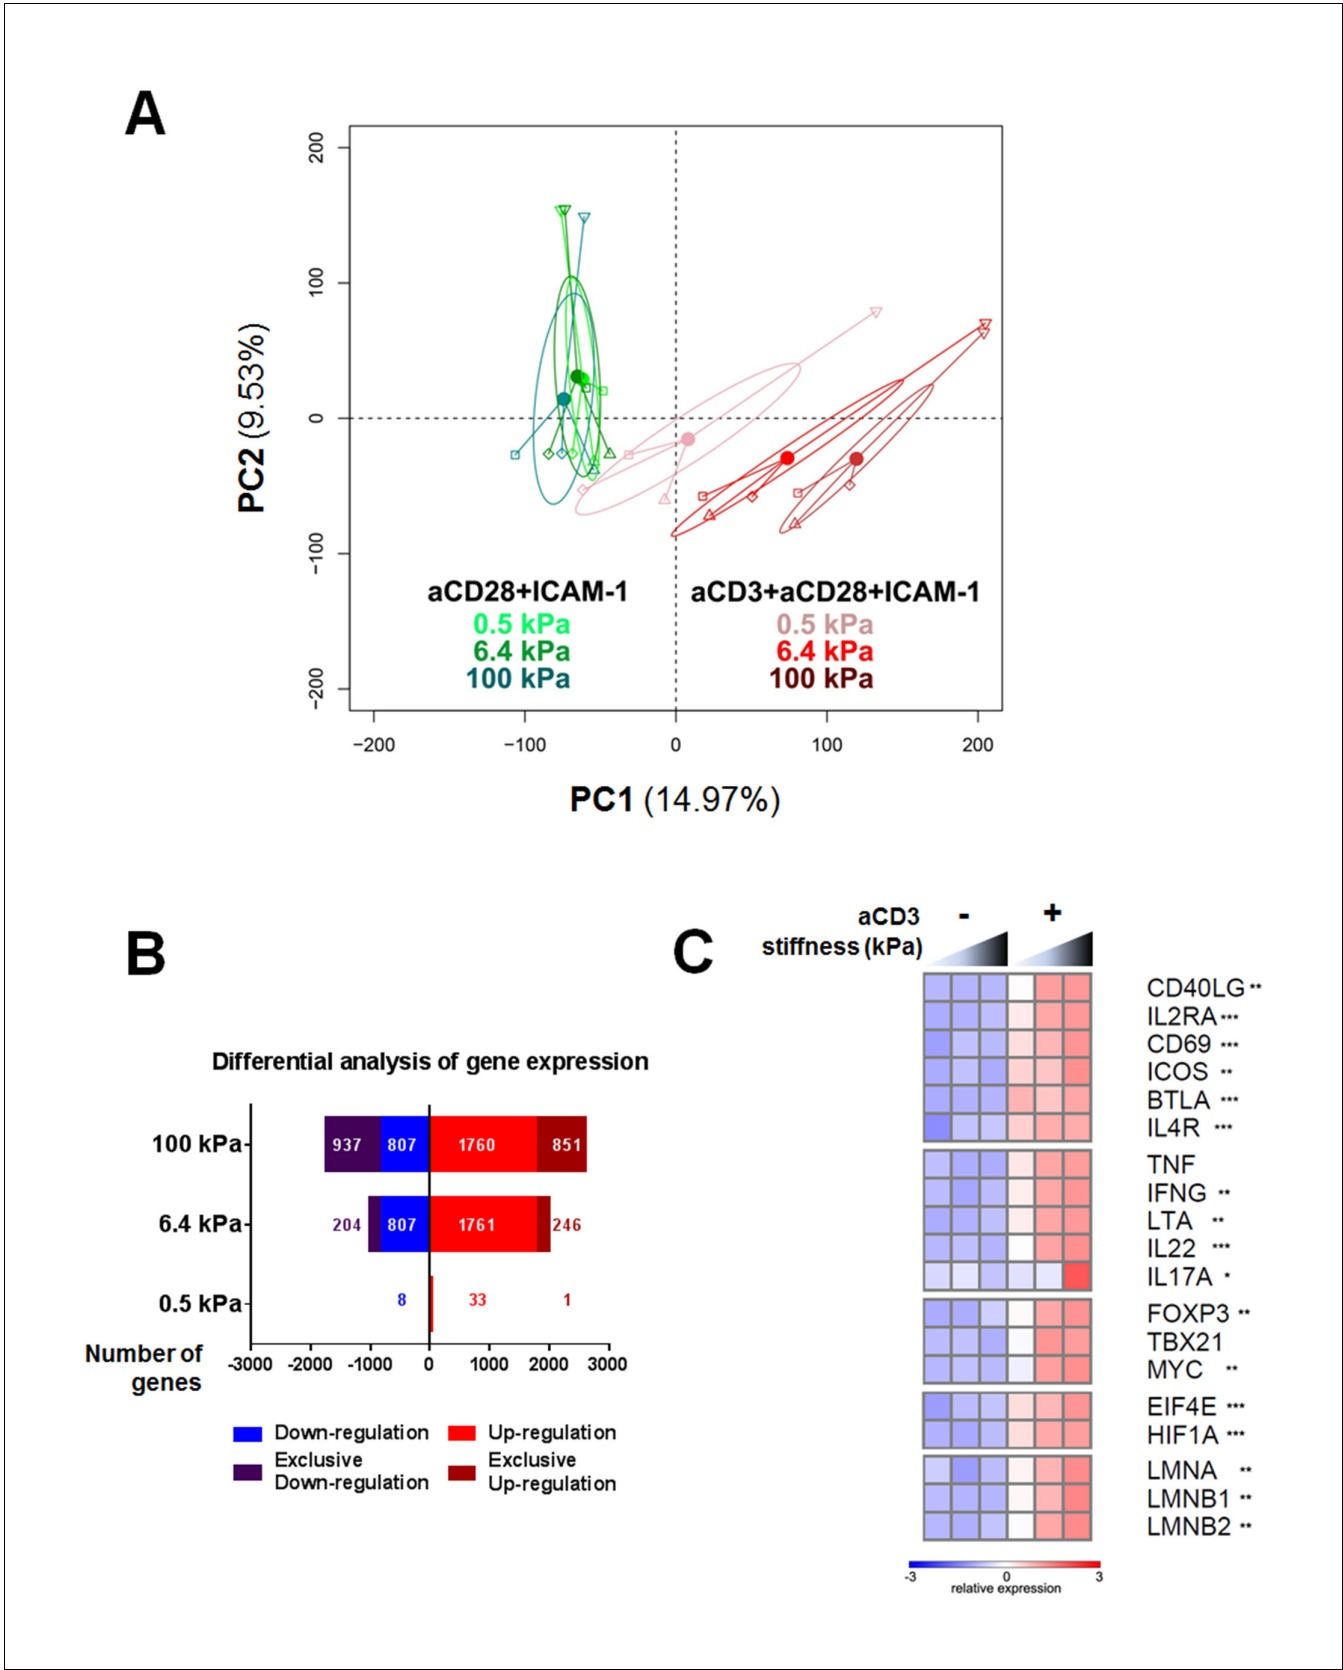

**Figure 2.** Gene expression of CD4<sup>+</sup> T cells shows a graded response to stiffness. (A) Principal component analysis reveals that gene expression is modulated by T cell substrate stiffness only in presence of aCD3 ( $n_{\text{Donors}}$ : 4). (B) Number of genes that displayed differential expression between the

*Figure 2 continued on next page*

*Figure 2 continued*

conditions with and without aCD3 on PA-gels of varying stiffness. 'Exclusive' indicates the genes that are found Up- or Down-regulated only at a given stiffness value. (C) Relative expression of T cell related genes following Affymetrix microarray analysis. Asterisks indicate the presence of these genes in the differential analysis: \*\*\* for 0.5 to 100 kPa, \*\* for 6.4 to 100 kPa, \* for 100 kPa only.

DOI: [10.7554/eLife.23190.012](https://doi.org/10.7554/eLife.23190.012)

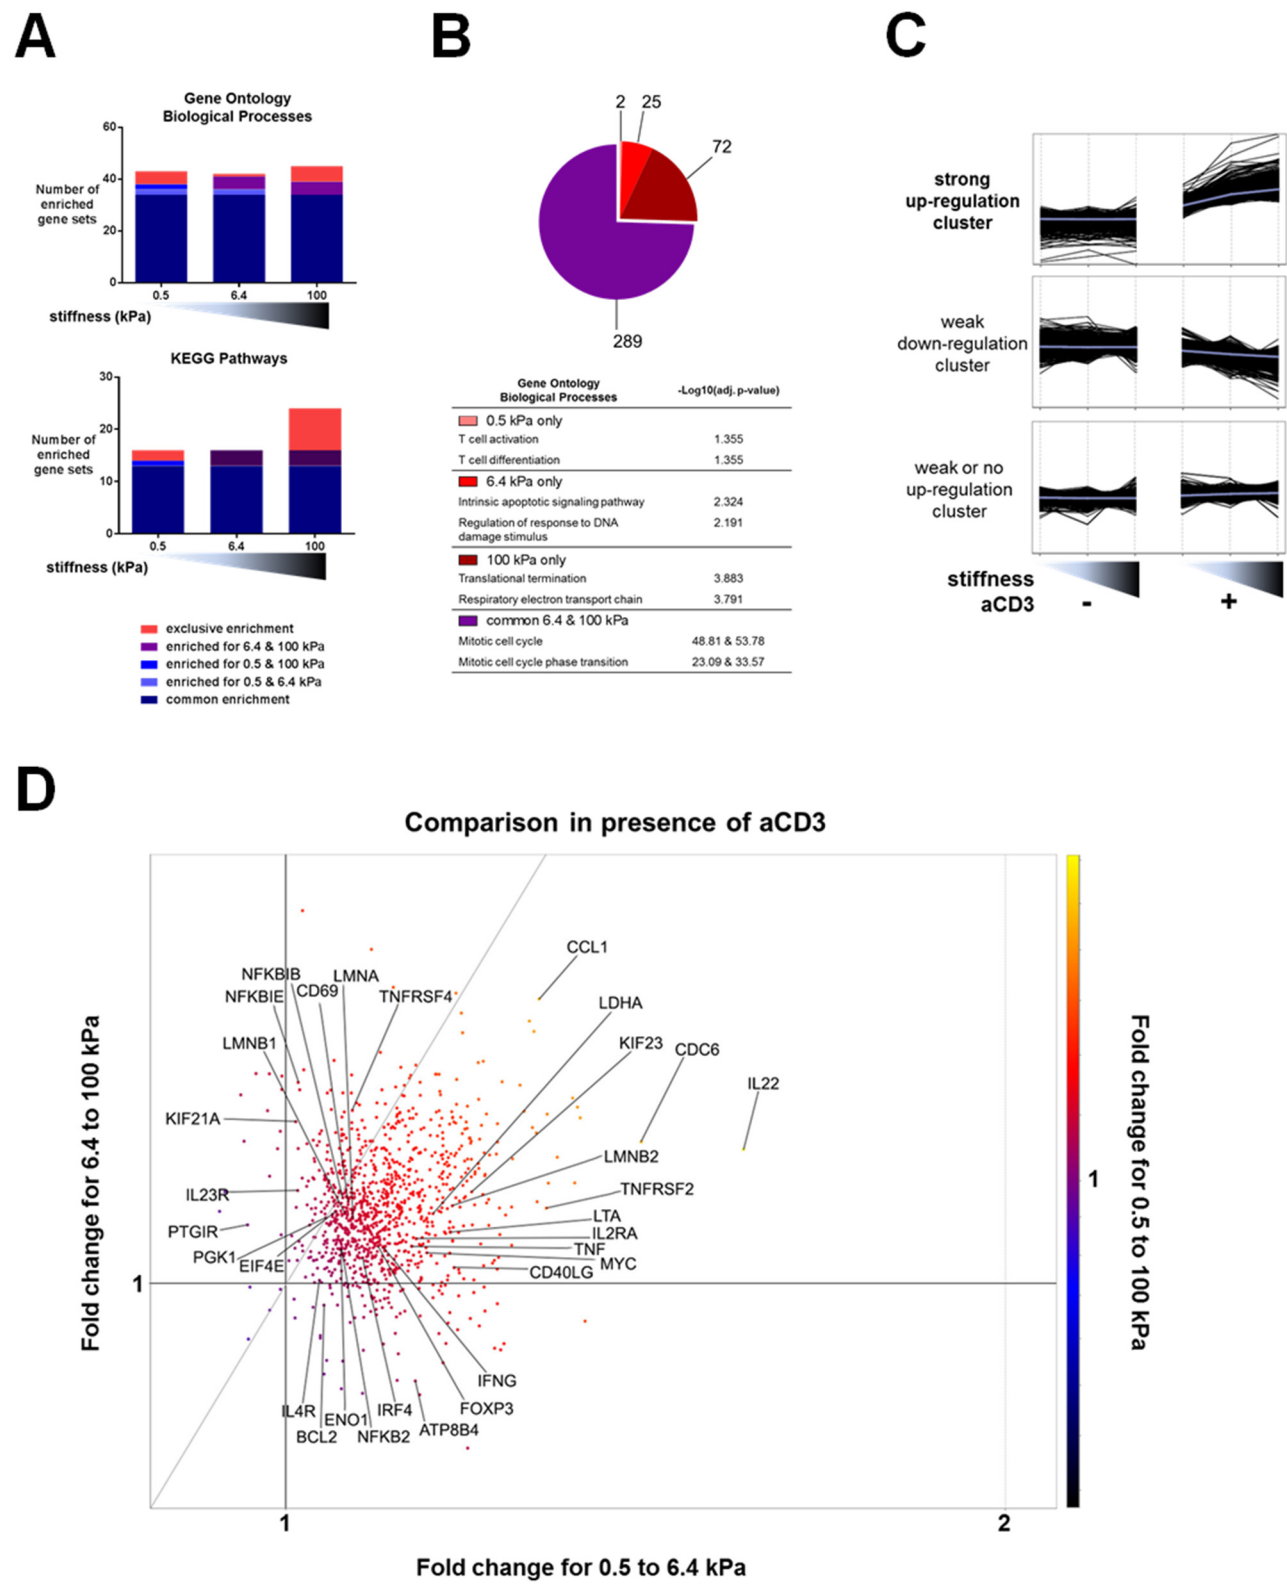

**Figure 3.** Stiffness potentiates TCR/CD3-induced transcriptional response. (A) Enrichment of gene sets on PA-gels of varying stiffness for p-values lower than 0.05, false discovery rates lower than 0.25 and NES values higher than 1.75. (B) Pathway analysis with the GO – BP database for differentially expressed genes between the conditions with and without aCD3 on PA gels of varying stiffness. The number of different pathways (pie-chart) and the top 2 hits of the enriched pathways, along with their negative log adjusted p-value (table), are shown. (C) K-means clustering of genes with different expression profiles on PA-gels of varying stiffness demonstrates three different clusters: one with strong up-regulation in the presence of aCD3 (containing 1022 probes), one with weak down-regulation (containing 4412 probes) and one with weak or no up-regulation (containing 5928 probes). (D) Comparison of the relative changes in gene expression in the presence of aCD3 for the strong up-regulation cluster. The x-axis shows the difference in gene expression for the transition of 0.5 to 6.4 kPa, the y-axis for the transition of 6.4 to 100 kPa and the colour gradient for the transition of 0.5 to 100 kPa.

DOI: [10.7554/eLife.23190.013](https://doi.org/10.7554/eLife.23190.013)

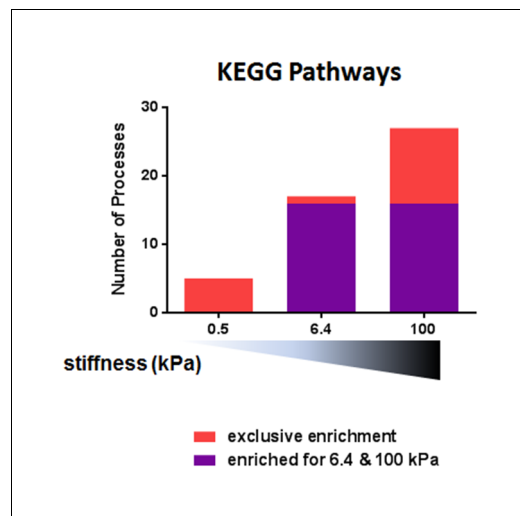

**Figure 3—figure supplement 1.** Pathway analysis with the KEGG database for differentially expressed genes between the conditions with and without aCD3 on PA gels of varying stiffness.

DOI: [10.7554/eLife.23190.014](https://doi.org/10.7554/eLife.23190.014)



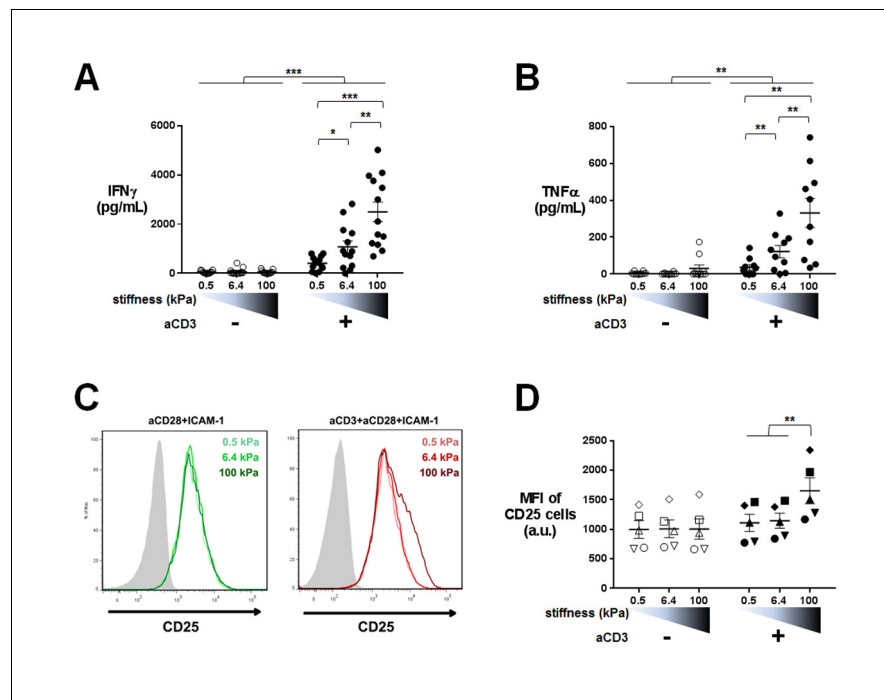

**Figure 4.** Cytokine production is sensitive to a wide range of stiffness. Production of (A) IFN $\gamma$  ( $n_{\text{Donors}}$ : 13) and (B) TNF $\alpha$  ( $n_{\text{Donors}}$ : 10) on PA-gels of varying stiffness. In the presence of aCD3, the aCD3:aCD28 coating ratio was 1:10. (C) FACS plot of CD25 staining. A representative experiment is shown. (D) Mean fluorescence intensity of CD25-stained cells ( $n_{\text{Donors}}$ : 5). Mean values with standard error are shown. For statistical analysis, paired parametric t-tests were performed: \*\*\*p-value<0.001, \*\*p-value<0.01, \*p-value<0.05.

DOI: [10.7554/eLife.23190.015](https://doi.org/10.7554/eLife.23190.015)

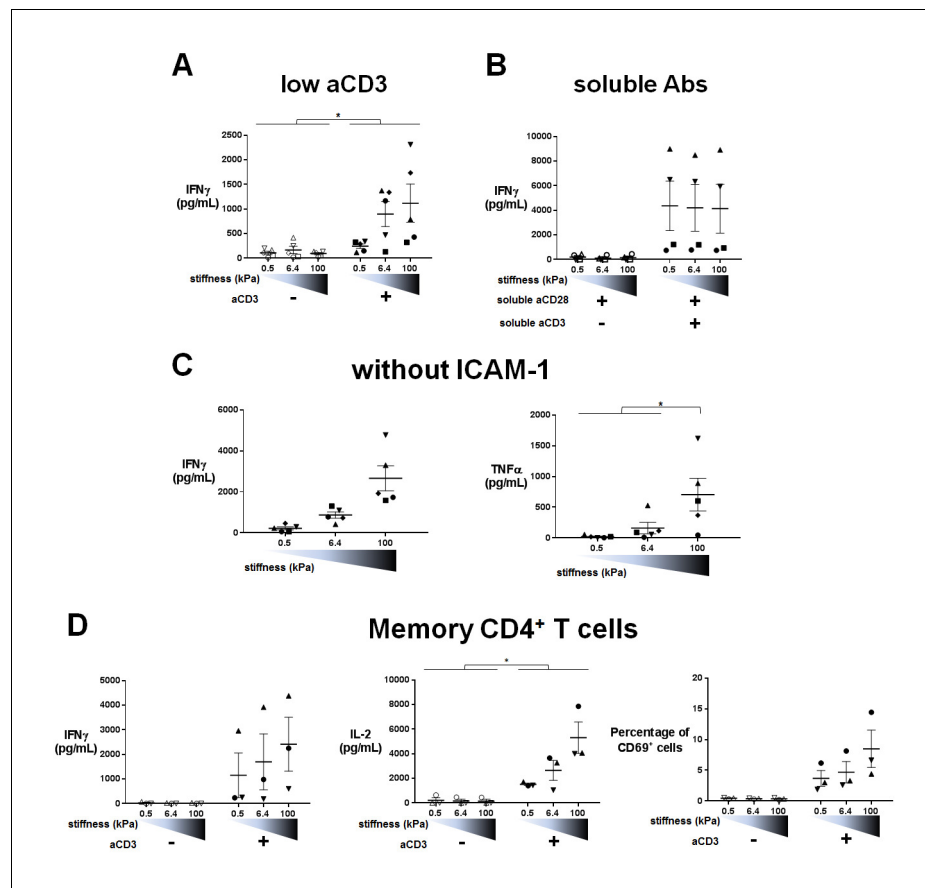

**Figure 4—figure supplement 1.** Cytokine production on PA-gels: additional data. (A) Production of IFN $\gamma$  on PA-gels of varying stiffness; in the presence of aCD3, the aCD3:aCD28 coating ratio was 1:100 ( $n_{\text{Donors}}$ : 5).

(B) Production of IFN $\gamma$  on PA-gels of varying stiffness for non-biotinylated soluble aCD3+aCD28 antibodies at concentrations of 1 + 10  $\mu\text{g/mL}$  respectively ( $n_{\text{Donors}}$ : 4). (C) Production of IFN $\gamma$  and TNF $\alpha$  on PA-gels of varying stiffness coated with aCD3+aCD28 only. The aCD3:aCD28 coating ratio was 1:10 ( $n_{\text{Donors}}$ : 5). (D) Production of IFN $\gamma$  and IL-2 and percentage of CD69 $^{+}$  cells for memory CD4 $^{+}$  T cells cultured on PA-gels of varying stiffness ( $n_{\text{Donors}}$ : 3). Mean values with standard error are shown. For statistical analysis, paired parametric t-tests were performed: \*p-value<0.05.

DOI: 10.7554/eLife.23190.016

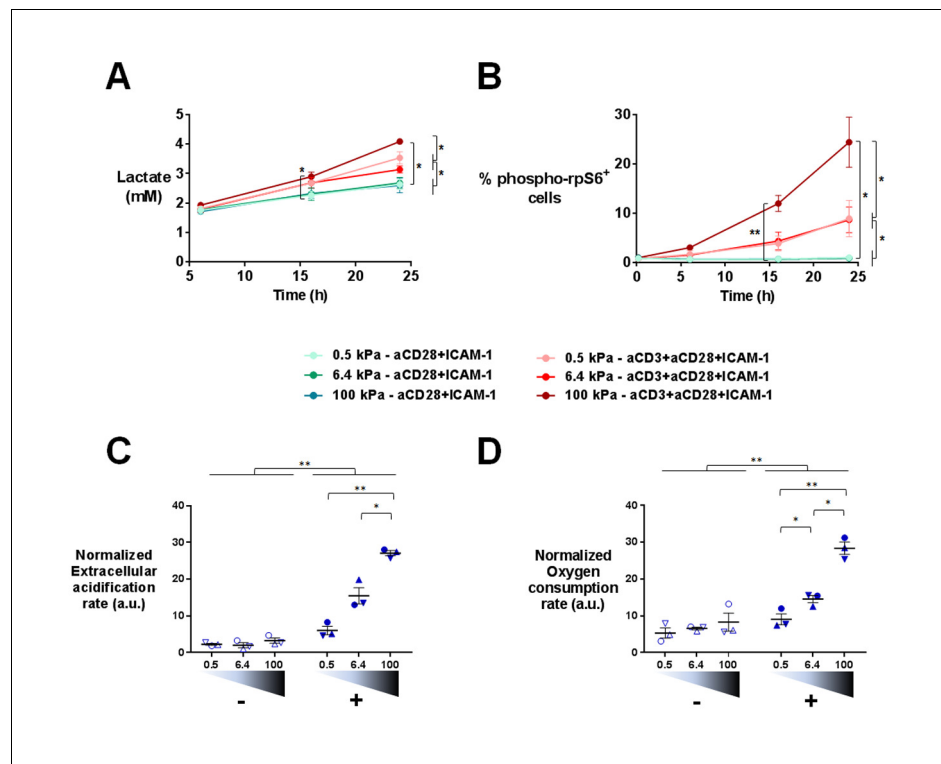

**Figure 5.** T cell metabolism is modulated by increased stiffness. (A) Lactate production in the supernatant of T cell cultures on PA-gels of varying stiffness. ( $n_{\text{Donors}}$ : 3). (B) Percentage of phospho-rpS6<sup>+</sup> T cells cultured on PA-gels of varying stiffness ( $n_{\text{Donors}}$ : 4). (C) Overall glycolytic capacity of T cells cultured on PA-gels of varying stiffness for 48 hr. The extracellular acidification rate is normalized to the number of cells per well. Mean values with standard error are shown ( $n_{\text{Donors}}$ : 3). (D) Maximal mitochondrial respiration of T cells following culture on PA-gels of varying stiffness for 48 hr. The oxygen consumption rate is normalized to the number of cells per well. Mean values with standard error are shown ( $n_{\text{Donors}}$ : 3). For statistical analysis, paired parametric t-tests were performed: \*\*p-value<0.01, \*p-value<0.05.

DOI: [10.7554/eLife.23190.017](https://doi.org/10.7554/eLife.23190.017)

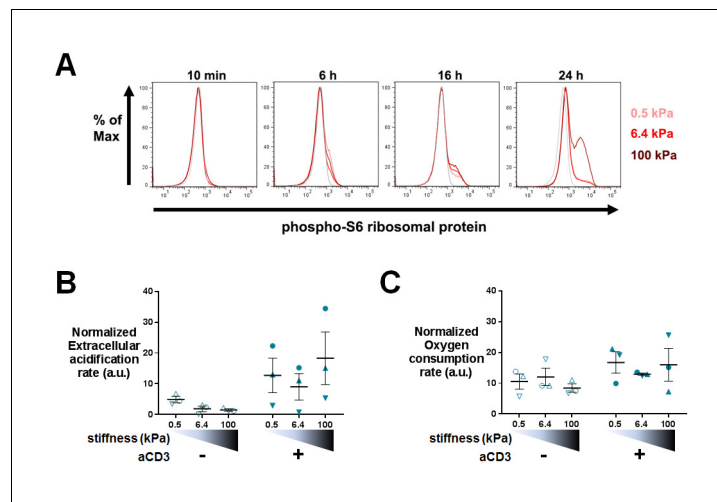

**Figure 5—figure supplement 1.** Phospho-rpS6 and metabolism: additional data. (A) Representative FACS analysis of phospho-rpS6<sup>+</sup> T cells at different culture times on aCD3+aCD28+ICAM-1 coated PA-gels of varying stiffness. (B) Overall glycolytic capacity of T cells following culture on PA-gels of varying stiffness for 24 hr. The extracellular acidification rate is normalized to the number of cells per well. Mean values with standard error are shown ( $n_{\text{Donors}}$ : 3). (C) Maximal mitochondrial respiration of T cells following culture on PA-gels of varying stiffness for 24 hr. The oxygen consumption rate is normalized to the number of the cells per well. Mean values with standard error are shown ( $n_{\text{Donors}}$ : 3).

DOI: [10.7554/eLife.23190.018](https://doi.org/10.7554/eLife.23190.018)

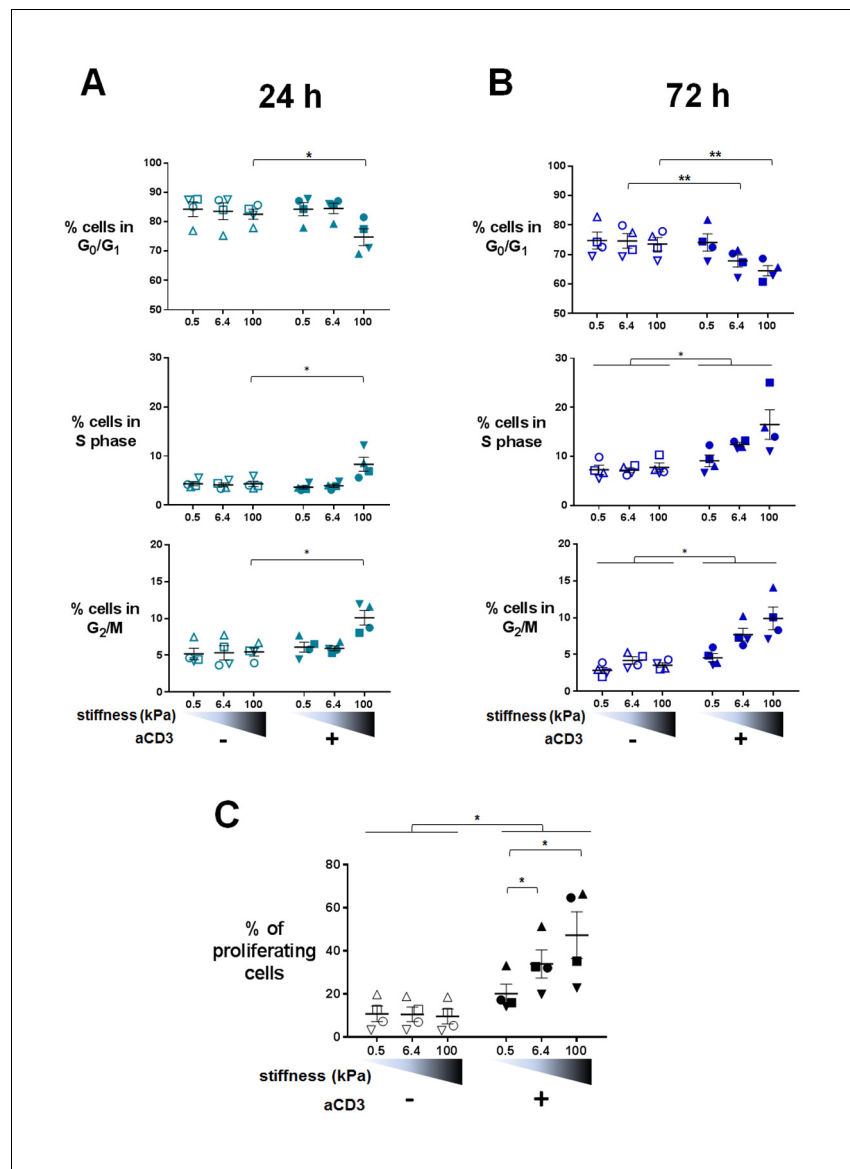

**Figure 6.** Proliferation and cell cycle progression are potentiated by stiffness in response to TCR/CD3 induced activation. The percentages of cells in  $G_0/G_1$ , S phase and  $G_2/M$  are shown for (A) 24 hr ( $n_{\text{Donors}}$ : 4) and (B) 72 hr ( $n_{\text{Donors}}$ : 4). (C) Percentage of proliferating T cells following 72 hr culture on PA-gels of varying stiffness. ( $n_{\text{Donors}}$ : 4). Mean values with standard error are shown. For statistical analysis, paired parametric t-tests were performed: \*\*p-value<0.01, \*p-value<0.05.

DOI: [10.7554/eLife.23190.019](https://doi.org/10.7554/eLife.23190.019)

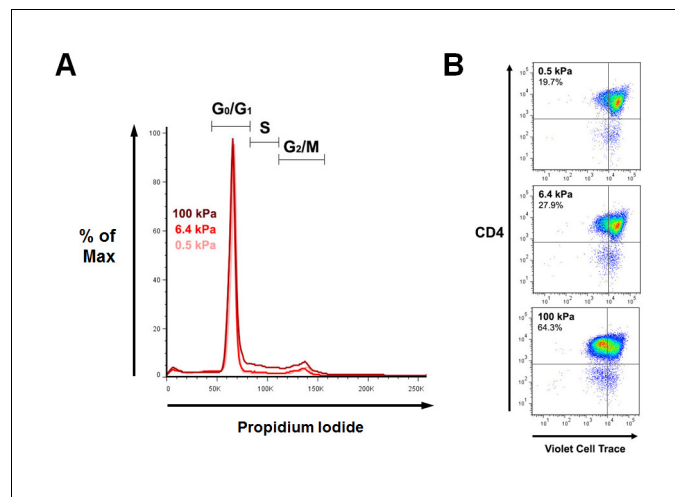

**Figure 6—figure supplement 1.** Cell cycle and proliferation: additional data. (A) Representative FACS analysis of propidium iodide staining of T cells following 24 hr culture on PA-gels in the presence of aCD3. (B) Representative dot plot of T cell proliferation following 72 hr culture on PA-gels in the presence of aCD3. DOI: [10.7554/eLife.23190.020](https://doi.org/10.7554/eLife.23190.020)

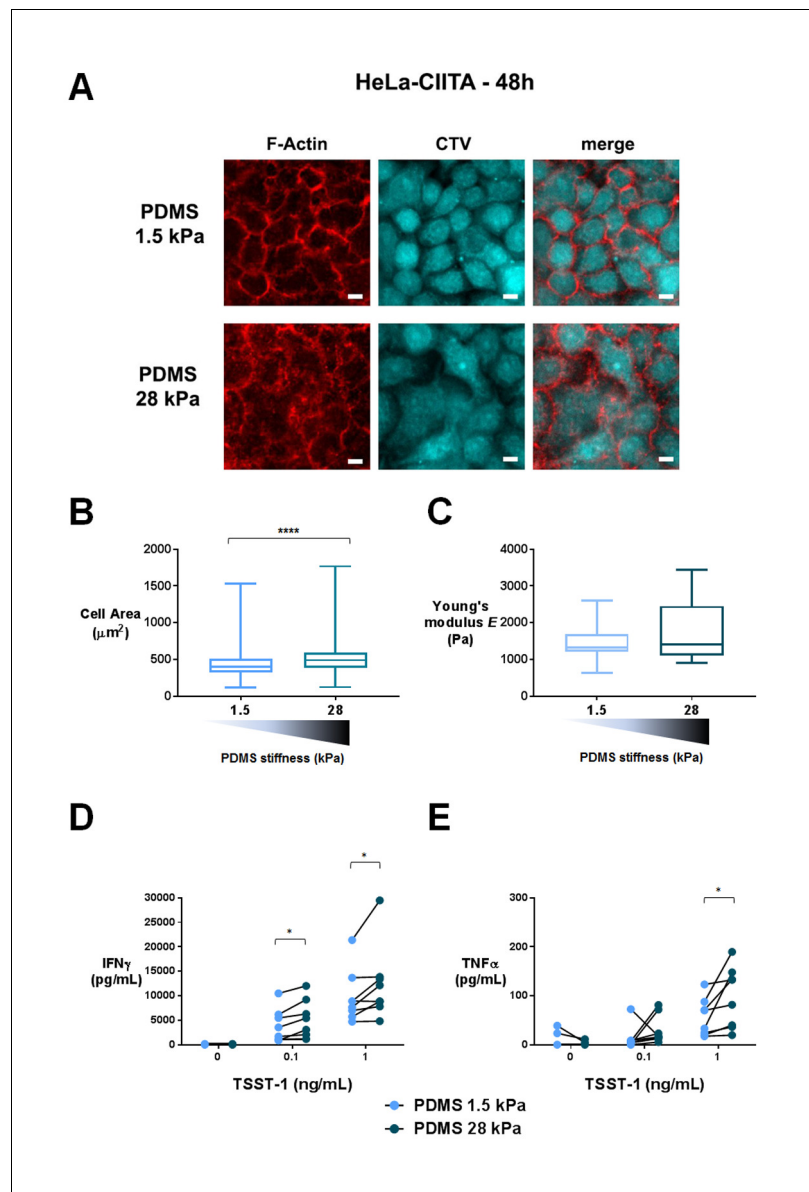

**Figure 7.** T cell activation is potentiated by APC mechanical properties. (A) HeLa-CIITA cells were grown at confluence on fibronectin coated PDMS gels of varying stiffness and were stained with phalloidin (F-Actin, in red) and cell trace violet (CTV, in cyan) (scale bar: 10  $\mu\text{m}$ ). (B) Area of HeLa-CIITA cells cultured on 1.5 kPa ( $453 \pm 14 \mu\text{m}^2$ ,  $n_{\text{cells}} = 254$ ) and 28 kPa ( $569 \pm 25 \mu\text{m}^2$ ,  $n_{\text{cells}} = 215$ ) PDMS gels. Boxes and whiskers for minimum and maximum are shown. For statistical analysis, unpaired t-tests with Welch's correction were performed: \*\*\*\*p-value<0.0001. (C) Young's modulus of HeLa-CIITA cells cultured on 1.5 kPa ( $1.43 \pm 0.15 \text{ kPa}$ ,  $n_{\text{cells}} = 13$ ) and 28 kPa ( $1.72 \pm 0.2 \text{ kPa}$ ,  $n_{\text{cells}} = 15$ ) PDMS gels. Boxes and whiskers for minimum and maximum are shown. Production of (D) IFN $\gamma$  and (E) TNF $\alpha$  by T cells interacting with HeLa-CIITA on PDMS gels of varying stiffness in the presence of different TSST-1 superantigen concentrations. The response for individual donors is shown ( $n_{\text{Donors}} = 8$ ). For statistical analysis, paired parametric t-tests were performed: \*p-value<0.05.

DOI: [10.7554/eLife.23190.021](https://doi.org/10.7554/eLife.23190.021)

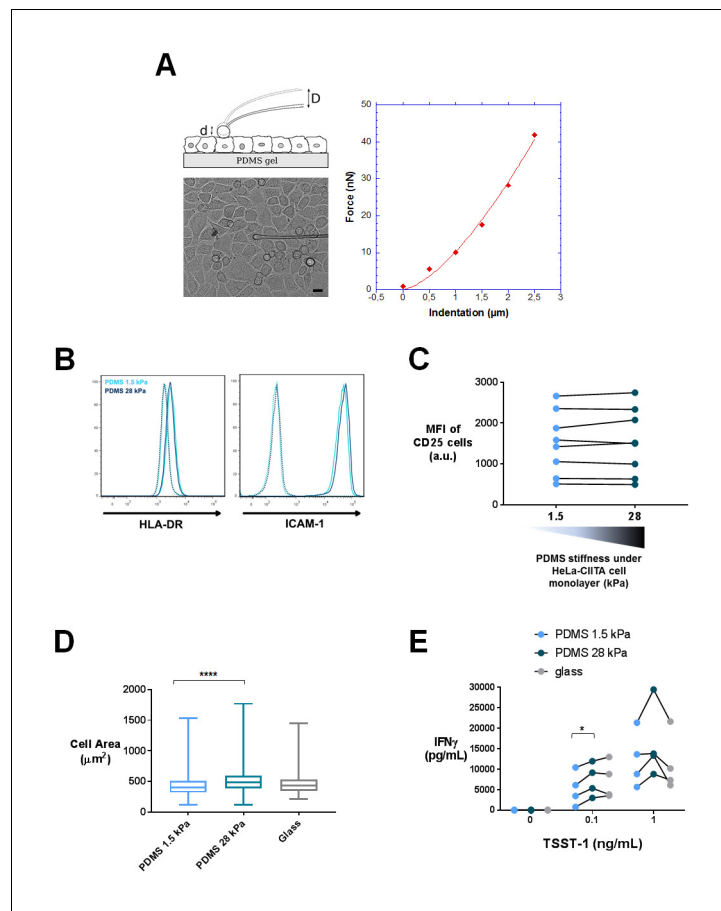

**Figure 7—figure supplement 1.** Characterization of APC mechanical properties and T cell activation: additional data. (A) Young's modulus measurement of HeLa-CIITA cells. Left: principle of measurement and image of the HeLa cell monolayer with the glass probe on top of it (scale bar: 10  $\mu\text{m}$ ). When the probe is lowered by a distance  $D$ , its tip indents the top of the cell leading to a tip displacement  $d < D$ . Thus, the probe is deflected and exerts an elastic force  $F = k \times (D - d)$ , where  $k$  is the calibrated probe stiffness. Right: force-indentation curve for an individual HeLa cell from a confluent layer, fitted following the Hertz model. (B) FACS plots of HeLa-CIITA cells stained for the APC markers HLA-DR and ICAM-1. Dotted lines display isotype antibody. (C) Mean fluorescence intensity of CD25 stained cells, which were activated for 24 hr by HeLa-CIITA cells grown at confluence on PDMS of varying stiffness in the presence of TSST-1 superantigen (1 ng/mL). The response for individual donors is shown ( $n_{\text{Donors}} = 8$ ). (D) Area of HeLa-CIITA cells cultured on 1.5 kPa ( $453 \pm 14 \mu\text{m}^2$ ,  $n_{\text{cells}} = 254$ ), 28 kPa ( $569 \pm 25 \mu\text{m}^2$ ,  $n_{\text{cells}} = 215$ ) PDMS gels or glass ( $473 \pm 19 \mu\text{m}^2$ ,  $n_{\text{cells}} = 140$ ). Boxes and whiskers for minimum and maximum are shown. (E) Production of IFN $\gamma$  by T cells interacting with HeLa-CIITA on PDMS gels of varying stiffness or glass in the presence of different TSST-1 superantigen concentrations. The response for individual donors is shown ( $n_{\text{Donors}} = 4$ ). For statistical analysis, paired parametric t-tests were performed: \*p-value < 0.05.

DOI: 10.7554/eLife.23190.022
